# Supplementary material
Source: publisher site journal article supplement (https://www.dovepress.com/article/260258)
Supplement: Supplementary file 1 [file get_supplementary_file.php]

**Supplemental Material**

TABLE S1 Breakdown of Samples Subjected to WGS

| **Type of Sample** | **Number** |
| --- | --- |
| Total Samples Sequenced | 349 |
| Ribaxamase Samples | 195 |
| Placebo Samples | 154 |
| Full 3 Sample Sets (T0, T1, T2) | 113 |
| Two Sample Sets (T0 and T1) | 5 |
| Full 3 Sample Sets-ribaxamase | 63 |
| Full 3 Sample Sets-placebo | 50 |
| Samples from Patients Receiving Macrolides | 144 |
| Samples from Patients who were VRE Colonized a | 40 |
| Samples from Patients who were ESBL-GNB Colonized a | 89 |

a Colonized as determined microbiologically at the time of sample collection

TABLE S2 Breakdown of Samples Subjected to qPCR Analysis

| **Type of Sample** | **Number** |
| --- | --- |
| Total Samples Analyzed | 100 |
| Ribaxamase Samples | 49 |
| Placebo Samples | 51 |
| Three Sample Sets-ribaxamase | 15 |
| Three Sample Sets-placebo | 14 |
| Macrolide Use | 44 |
| VRE Colonization a | 19 |
| ESBL-GNB Colonization b | 19 |

a Microbiologically positive for VRE at the time of sample collection

b Microbiologically positive for ESBL-GNB at the time of sample collection

TABLE S3 Parameters Selected for Statistical Analysis

| **Parameter** | **Values** |
| --- | --- |
| Age | Continuous variable |
| Treatment Arm | Placebo vs. ribaxamase |
| Ceftriaxone plus macrolides | Received any macrolides during study |
| No food by mouth (NPO) | NPO at any time during study  (as a surrogate for sicker patients) |
| Received a proton pump inhibitor | Received PPI at any time during study |
| Gender | Male vs. Female |

**Table S4** AMR Genes and Variants of Interest with >500 Hits Across the Sample Set

| Gene | Total Hitsa | # samples b | Range c |
| --- | --- | --- | --- |
| CfxA6 | 535,181 | 309 | 117,131 |
| CfxA3 | 229,261 | 335 | 22,534 |
| CfxA2 | 199,467 | 334 | 11,924 |
| CfxA5 | 177,247 | 332 | 13,662 |
| CfxA4 | 171,730 | 333 | 11,261 |
| CfxA | 158,315 | 328 | 10,593 |
| *mefA* | 91,609 | 324 | 9,605 |
| CblA-1 | 78,578 | 312 | 23,418 |
| *mel* | 70,445 | 306 | 6,148 |
| *cepA* | 6,721 | 130 | 902 |
| *vanSA* | 6,007 | 29 | 5,098 |
| *vanHA* | 4,910 | 26 | 4,218 |
| *vanYA* | 4,843 | 20 | 4,200 |
| *vanA* | 4,833 | 28 | 4,116 |
| OXA-347 | 4,642 | 64 | 2,850 |
| OXA-1 | 4,567 | 37 | 3,026 |
| OXA-1 | 3,723 | 28 | 2,654 |
| *vanRA* | 3,387 | 26 | 2,867 |
| OXA-320 | 3,234 | 31 | 2,264 |
| *vanXA* | 2,763 | 24 | 2,401 |
| *vanZA* | 2,522 | 22 | 2,200 |
| *vanTG* | 2,333 | 111 | 394 |
| OXA-48 | 1,951 | 6 | 1,918 |
| OXA-245 | 1,524 | 6 | 1,485 |
| *vanWG* | 1,446 | 152 | 673 |
| OXA-4 | 1,416 | 24 | 1029 |
| OXA-224 | 1,343 | 24 | 977 |
| OXA-31 | 1,190 | 22 | 816 |
| CTX-M-33 | 1,119 | 36 | 834 |
| *vanD* | 1,114 | 87 | 539 |
| OXA-33 | 1,080 | 18 | 754 |
| OXA-370 | 1,060 | 4 | 1,024 |
| OXA-244 | 1,043 | 10 | 1,011 |
| OXA-162 | 1,043 | 8 | 1,013 |
| OXA-163 | 961 | 5 | 932 |
| CTX-M-15 | 879 | 26 | 680 |
| *vanXYG* | 866 | 106 | 227 |
| *vanG* | 863 | 96 | 239 |
| OXA-247 | 863 | 5 | 832 |
| CTX-M-156 | 717 | 26 | 539 |
| CTX-M-117 | 716 | 28 | 545 |
| CTX-M-88 | 705 | 32 | 530 |
| *vanSB* | 700 | 42 | 429 |
| CTX-M-28 | 695 | 34 | 525 |
| CTX-M-107 | 689 | 33 | 514 |
| CTX-M-71 | 670 | 25 | 480 |
| CTX-M-55 | 660 | 21 | 516 |
| CTX-M-103 | 658 | 27 | 481 |
| CTX-M-157 | 650 | 32 | 517 |
| CTX-M-101 | 650 | 25 | 483 |
| CTX-M-3 | 650 | 25 | 449 |
| *vanRD* | 646 | 102 | 223 |
| CTX-M-139 | 646 | 30 | 491 |
| CTX-M-142 | 627 | 25 | 475 |
| CTX-M-109 | 618 | 35 | 467 |
| CTX-M-82 | 597 | 21 | 448 |
| *vanW* | 581 | 73 | 236 |
| CTX-M-42 | 574 | 27 | 402 |
| CTX-M-22 | 563 | 29 | 422 |
| CTX-M-72 | 542 | 24 | 410 |
| CTX-M-108 | 542 | 24 | 395 |
| *vanSD* | 539 | 104 | 205 |
| CTX-M-80 | 537 | 26 | 356 |
| CTX-M-155 | 525 | 23 | 408 |
| CTX-M-69 | 523 | 23 | 389 |
| CTX-M-66 | 520 | 31 | 390 |
| OXA-199 | 518 | 8 | 496 |
| CTX-M-114 | 517 | 23 | 386 |
| CTX-M-54 | 515 | 19 | 363 |

a Total number of matches in sample set

b Number of samples in set with at least one hit for the gene or variant

c Maximum range of hits, all gene or variants had at least one sample with zero hits

**TABLE S5** Efflux Pump Genes and Variants Demonstrating a Significant Increase of Number of Hits from T0 to T1 for Various Clinical Parameters

| **Gene** | **Placebo Treatment** | **Macrolide Treatment a** | **NPO Status b** | **Total Hits c** |
| --- | --- | --- | --- | --- |
| *evgS* | 0.0042 d | 0.0004 | 0.0121 | 162,399 |
| *mdtF* | 0.0050 | 0.0008 | 0.0211 | 153,522 |
| *acrF* | 0.0009 | 0.0005 | 0.0103 | 149,639 |
| *acrD* | 0.0069 | 0.0003 | 0.0290 | 138,815 |
| *mdtB* | 0.0094 | 0.0004 | 0.0301 | 128,001 |
| *mdtC* | 0.0034 | 0.0003 | 0.0247 | 119,681 |
| *tolC* | 0.0069 | 0.0001 | 0.0236 | 71,486 |
| *mdtL* | 0.0086 | 0.0004 | 0.0138 | 58,266 |
| *mdtD* | 0.0174 | 0.0004 | 0.0450 | 55,393 |
| *mdtE* | 0.0103 | 0.0008 | 0.0223 | 54,545 |
| *acrE* | 0.0059 | 0.0006 | 0.0140 | 53,639 |
| *mdtM* | 0.0163 | 0.0006 | 0.0169 | 51,676 |
| *acrA* | 0.0040 | 0.0004 | 0.0330 | 49,813 |
| *mdtA* | 0.0097 | 0.0002 | 0.0300 | 49,057 |
| *acrB* | 0.0269 | 0.0002 | 0.0418 | 48,131 |
| *gadX* | 0.0235 | 0.0006 | 0.0251 | 43,783 |
| *mdfA* | 0.0151 | 0.0014 | 0.0343 | 43,054 |
| *mdtH* | 0.0109 | 0.0004 | 0.0303 | 42,972 |
| *gadW* | 0.0150 | 0.0042 | 0.0248 | 41,541 |
| *mdtG* | 0.0140 | 0.0014 | 0.0263 | 41,541 |
| CRP | 0.0209 | 0.0004 | NS e | 33,258 |
| *mdtO* | 0.0221 | 0.0003 | NS | 33,140 |
| *gadE* | 0.0131 | 0.0006 | 0.0142 | 27,848 |
| *acrS* | 0.0263 | 0.0038 | 0.0226 | 27,819 |
| *kdpE* | 0.0137 | 0.0016 | 0.0294 | 25,933 |
| *evgA* | 0.0153 | 0.0011 | 0.014 | 25,425 |
| *mdtP* | 0.0099 | 0.0022 | 0.018 | 24,570 |
| *mdtN* | 0.0375 | 0.0002 | 0.0483 | 24,497 |
| H-NS | 0.0423 | 0.0015 | 0.0462 | 17,659 |
| *marA* | 0.0332 | 0.0020 | 0.0418 | 9,946 |

a Received macrolide treatment in addition to ceftriaxone treatment

b NPO status anytime during the clinical study

c The total number of hits for this gene variant in the sample set

d P-value is from linear regression model

e Correlationnot significant

**Table S6**: Clinical Sites Enrolling at Least One Patient in the Phase 2b Ribaxamase Study

| **Country** | **Site Name** | **PI Last Name** | **First Name** |
| --- | --- | --- | --- |
| Serbia | Clinical Hospital Centre Bežanijska Kosa, Department of Pulmology | Radosavljevic | Vojislav |
| Bulgaria | MHAT, Lovech, Department of Pulmonology and Phthisiology | Kirov | Mihail |
| Serbia | Clinical Centre Kragujevac, Clinic for infectious diseases | Gajovic | Olgica |
| Bulgaria | UMHAT , Propedeutics of Internal Diseases Clinic – Department of Pulmonology | Georgiev | Ognian |
| Romania | Spitalul Clinic Municipal, sectia de Pneumoftiziologie | Davidescu | Lavinia |
| Serbia | Clinical Centre of Serbia, Clinic for Infectious and Tropical diseases | Ranin | Jovan |
| Serbia | Health Centre Uzice, Department for Pulmonary Deseases and Tuberculosis | Radojevic | Zorica |
| Romania | Spitalul Clinic Municipal, sectia de Pneumoftiziologie | Mircea | Marta |
| Bulgaria | MHAT, Kyustendil, Department of Pulmonology and Phthisiology | Pavlova | Sashka |
| Bulgaria | SHATPPD, Ruse EOOD, Pulmonology Ward | Metev | Hristo |
| Serbia | Clinical Center of Nis, Clinic for pulmonary diseases and tuberculosis, Knez Selo | Nastasijevic-Borovac | Desa |
| Hungary | Debreceni Egyetem Klinikai Központ | Szilasi | Mária |
| Romania | Spitalul Clinic de Urgenta Arad, Sectia Clinica de Pneumologie | Nini | Gheorghe |
| Romania | Institutul de Pneumoftiziologie Marius Nasta | Zaharia | Dragos |
| Romania | Spitalul Clinic de Pneumoftiziologie Leon Daniello | Magadau | Cosmina |
| Romania | Spitalul Clinic de Boli Infectioase si Pneumoftiziologie Victor Babes Timisoara | Marc | Monica |
| Bulgaria | MHAT, Gabrovo, Department of Internal Diseases | Donchev | Krasimir |
| Poland | Uniwersytecki Szpital Kliniczny w Białymstoku, II Klinika Chorób Płuc i Gruźlicy | Mróz | Robert |
| Poland | Szpital Wojewódzki im. Św. Łukasza; Samodzielny Publiczny Zakład Opieki Zdrowotnej w Tarnowie, Oddział Chorób Wewnętrznych i Ostrych Zatruć | Łata | Stanislaw |
| Bulgaria | MHAT, Sevlievo, Department of Internal Diseases | Stanchev | Ivo |
| Serbia | General Hospital Cacak, Department for Pulmonary Deseases and Tuberculosis | Lazovic | Nada |
| Romania | Spitalul Universitar de Urgenta Elias, Geriatrie Gerontologie si Psihogeriatrie | Spiru | Luiza |
| Romania | Spitalul Clinic de Boli Infectioase si Pneumoftiziologie Victor Babes Timisoara | Mihaicuta | Stefan |
| Bulgaria | NMTH, Tsar Boris III, Department of Internal Diseases with a Pulmonary Function Testing | Sotirov | Sotir |
| Poland | Oddział Kliniczny Pulmonologii i Alergologii z Pracownią Diagnostyki Bronchoskopowej, Pracownią Fizjopatologii Oddychania oraz Pracownią Polisomnografii | Rybacki | Cezary |
| Poland | Szpital w Chodzieży, Wielkopolskie Centrum Pulmonologii | Ławiński | Piotr |
| USA | Florida Hospital Deland | Oguchi | Godson |
| Serbia | Clinical Centre of Serbia, Clinic for Pulmonary Diseases | Milenkovic | Branislava |
| Hungary | Uzsoki Utcai Kórház | Vennes | Zsuzsanna |
| Hungary | Dr. Kenessey Albert Kórház-Rendelőintézet | Frankfurter | Zsuzsanna |
| Romania | Spitalul Clinic de Urgenta, Sf. Ioan | Balaceanu | Alice |
| Romania | Spitalul Clinic de Boli Infecțioase și Pneumoftiziologie, Dr. Victor Babeș Craiova,Clinica de Boli Infectioase Adulti II | Diaconescu | Iulian |
| Romania | Spitalul Clinic de Boli Infectioase si Tropicale, Dr Victor Babes | Trailescu | Ana Maria |
| Hungary | Veszprém Megyei Tüdőgyógyintézet Farkasgyepű | Medgyasszay | Balázs |
| Romania | Spitalul Clinic De Boli Infectioase | Muntean | Monica |
| Romania | Institutul National de Boli Infectioase Prof. Dr. Matei Bals | Hristea | Adriana |
| Poland | Klinika Chorób Wewnętrznych, Diabetologii i Farmakologii Klinicznej, Samodzielny Publiczny Zakład Opieki Zdrowotnej Centralny Szpital Kliniczny Uniwersytetu Medycznego w Łodzi, | Drzewoski | Józef |
| Poland | Oddział Chorób Wewnętrznych, Zespół Opieki Zdrowotnej w Oławie | Ściborski | Ryszard |
| Poland | Oddział Chorób Wewnętrznych, Samodzielny Publiczny Zakład Opieki Zdrowotnej w Siedlcach | Wojtach | Joanna |
| Serbia | Clinical Centre of Vojvodina, Clinic for Infectious Disease | Turkulov | Vesna |
| Bulgaria | MDHAT, Tarnovo, First Department of Internal Diseases | Taseva | Margarita |
| Poland | Klinika Chorób Wewnętrznych i Alergologii, Centralny Szpital Kliniczny Ministerstwa Spraw Wewnętrznych w Warszawie | Andrzej | Fal |
| Poland | Oddział Chorób Wewnętrznych i Nefrologii z Ośrodkiem Dializ Szpital Wojewódzki im. Św. Łukasza Samodzielny Publiczny Zakład Opieki Zdrowotnej w Tarnowie | Sydor | Antoni |
| Poland | Samodzielny Publiczny Zakład Opieki Zdrowotnej w Bochni Szpital Powiatowy | Gucwa | Jarosław |
| Canada | Toronto East General Hospital, Toronto, Ontario | Powis | Jeff |
| Canada | Centre Hospitalier Universitaire de Sherbrokke, Sherbrooke, Quebec | Valiquette | Louis |
| Serbia | Military Medical Academy, Clinic for pulmonary diseases | Acimovic | Slobodan |
| Serbia | Clinical Hospital Centre "Zvezdara", Clinical Department of Geriatry | Erceg | Predrag |
| Romania | Spitalul Clinic Judetean de Urgenta Brasov | Nedelcu | Laurentiu |
| Poland | Uniwersytecki Szpital Kliniczny nr 1 im. Norberta Barlickiego Uniwersytetu Medycznego w Łodzi, Oddział Kliniczny Pulmonologii Ogólnej i Onkologicznej | Adam | Antczak |
| Poland | Powiatowy Zespół Zakładów Opieki Zdrowotnej, Oddział Chorób Wewnętrznych A | Hamankiewicz | Maciej |
| Poland | Wojewódzki Szpital Specjalistyczny w Tychach, Oddział Geriatryczny | Marcisz | Czesław |
| USA | Natchitoches Regional Medical Center, Natchitoches, LA | Barnum | Otis |
| USA | Baptist Health Medical Center, Little Rock, AK | Wijewardane | Priyantha |

The appropriate institutional review boards or ethics committees at these institutions approved the Phase 2b clinical study with ribaxamase which was the source of samples for this study.
